# Supplementary material
Source: PubMed Central journal article supplement (PMC3277234)
Supplement: mt2011237x1.pdf [file mt2011237x1.pdf]

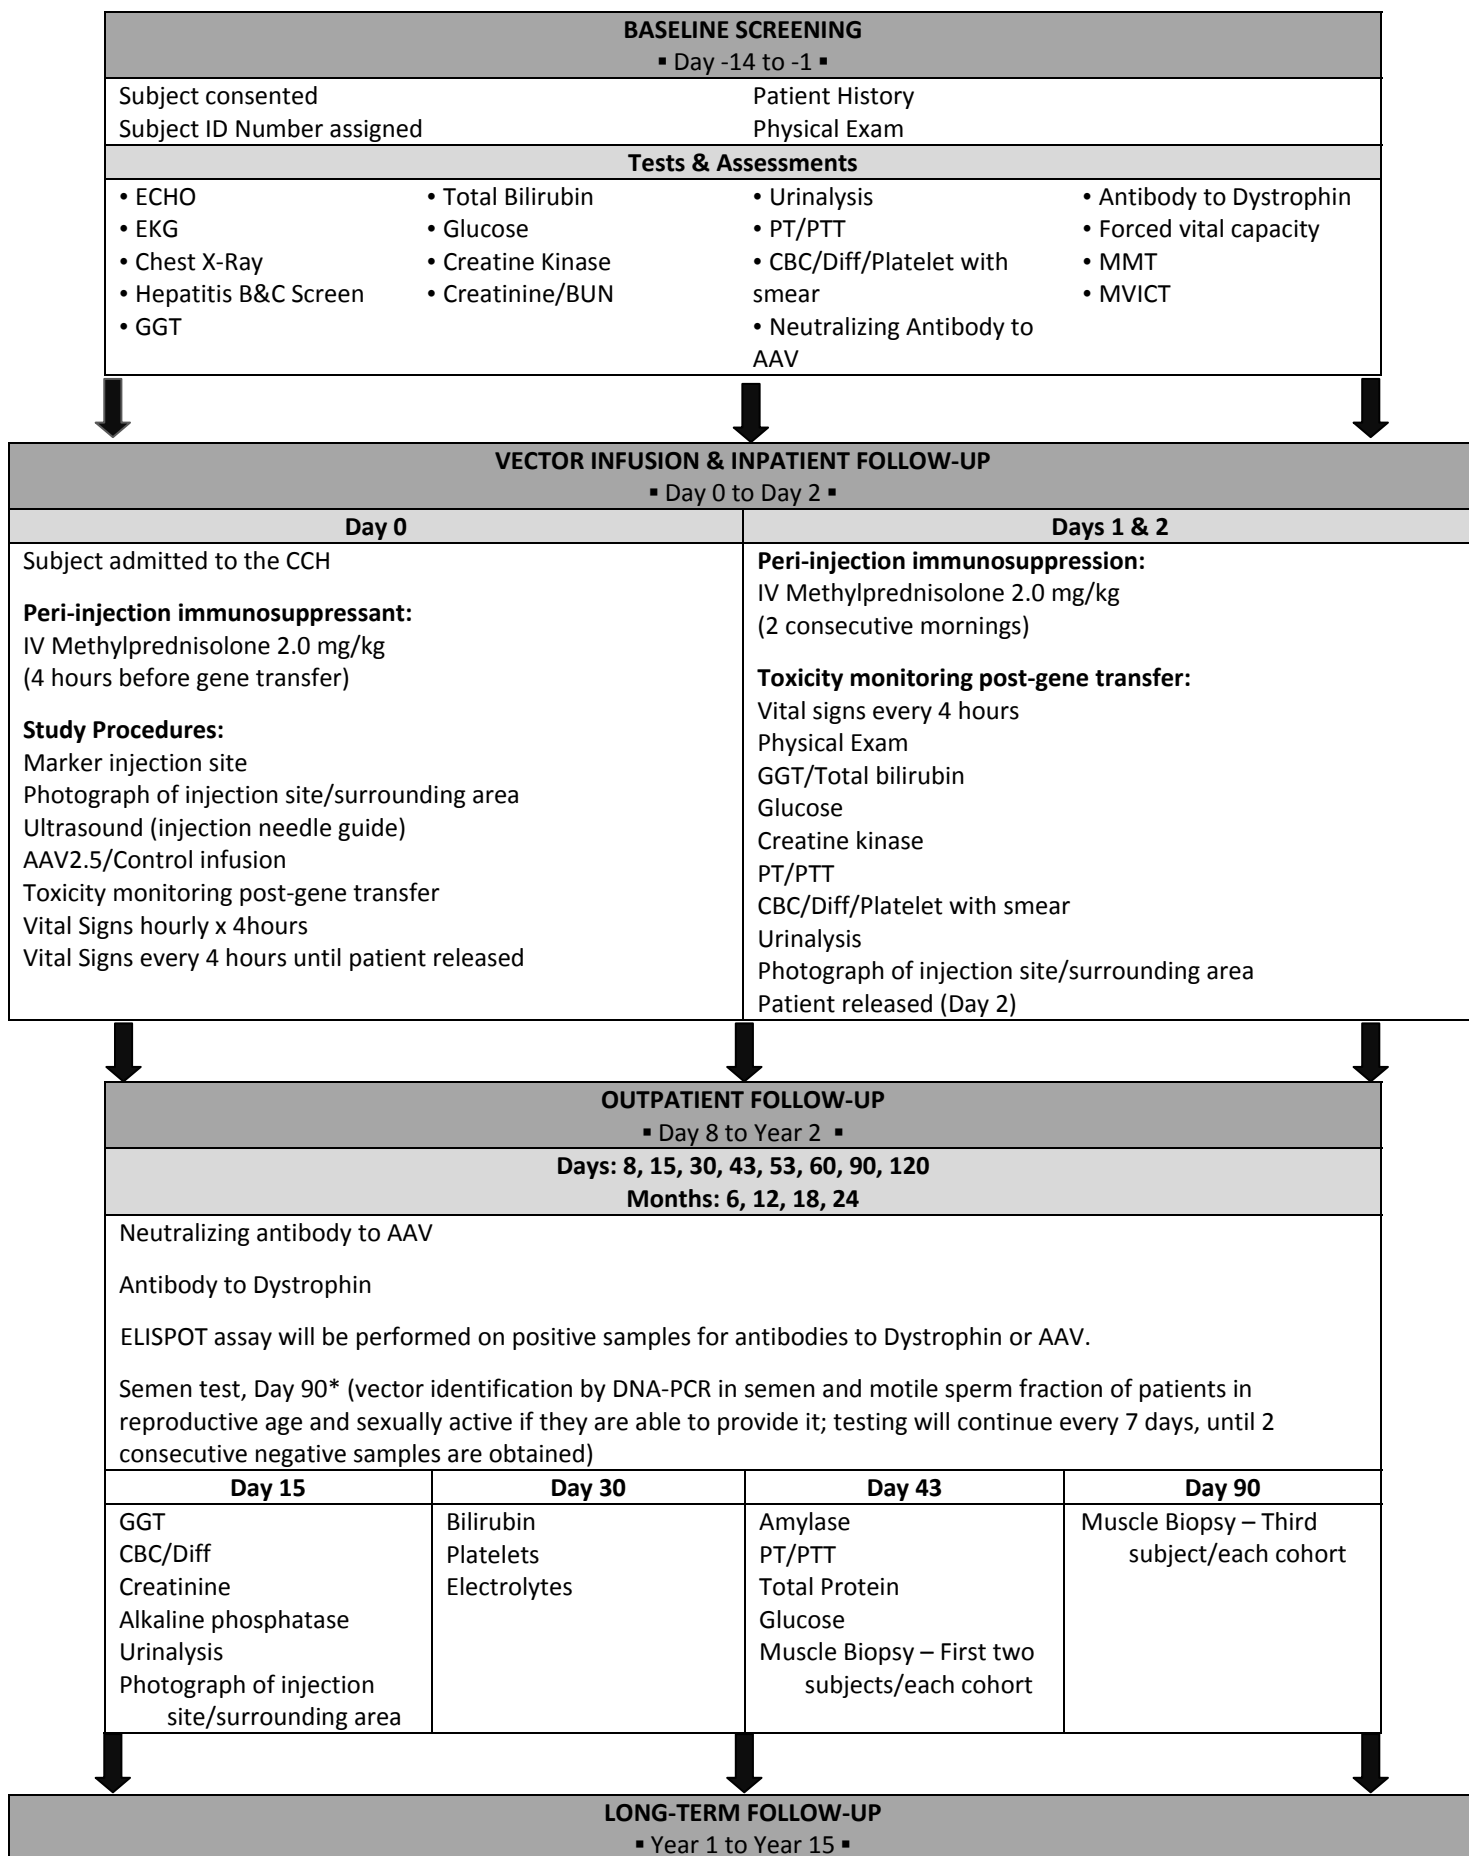

We will evaluate short-term safety over a two-year period that incorporates the active phase of the protocol. If newly identified risks are associated with our product, or if the patients suffer any adverse events during this period, we will initiate a long-term follow-up.
