# Supplementary material
Source: PubMed Central journal article supplement (PMC3277234)
Supplement: mt2011237x2.pdf [file mt2011237x2.pdf]

# CHEMISTRIES

## CREATININE

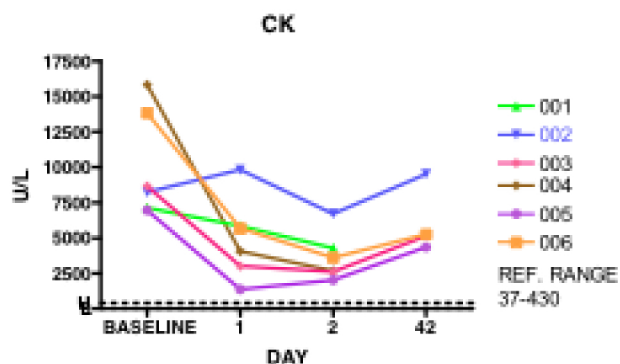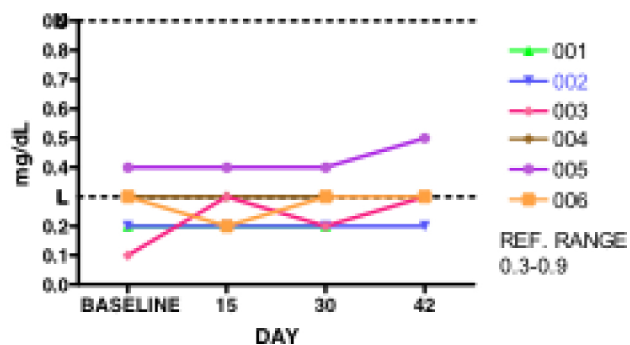

## ALK PHOSPHATASE

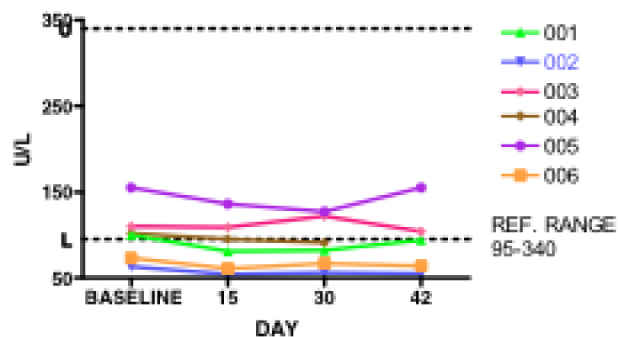

## GGT

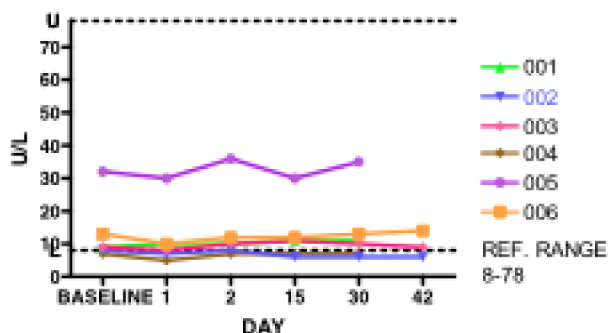

## TOTAL BILI

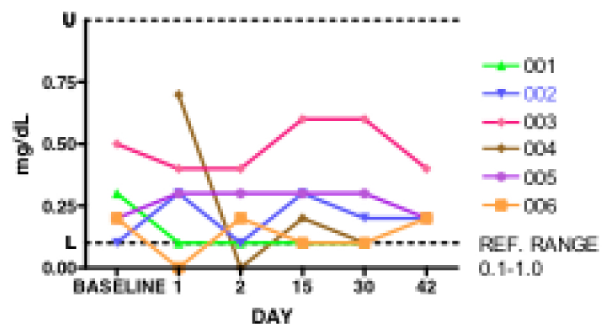

## TOTAL PROTEIN

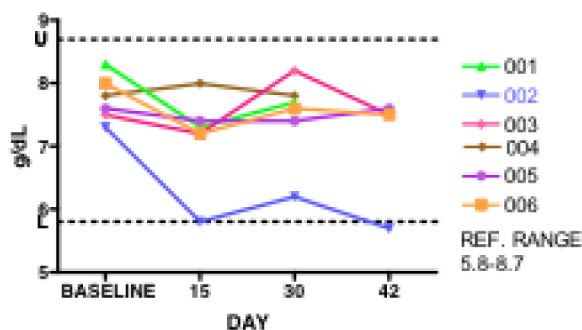

## BUN

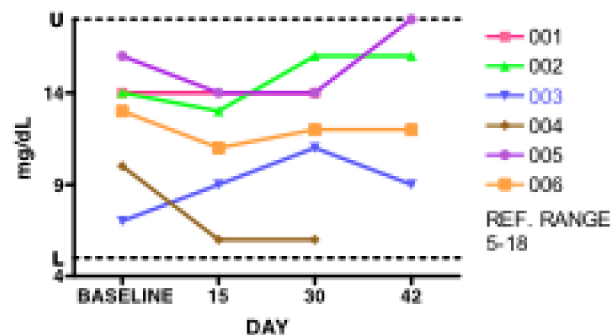

## AMYLASE

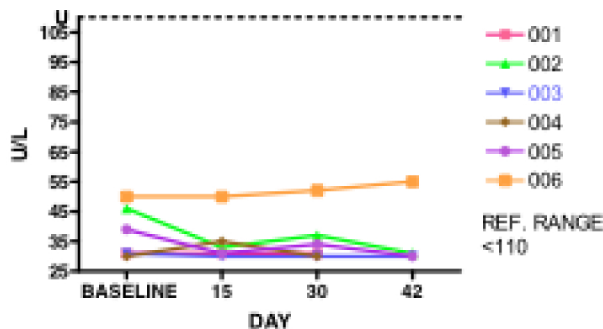

# ELECTROLYTES

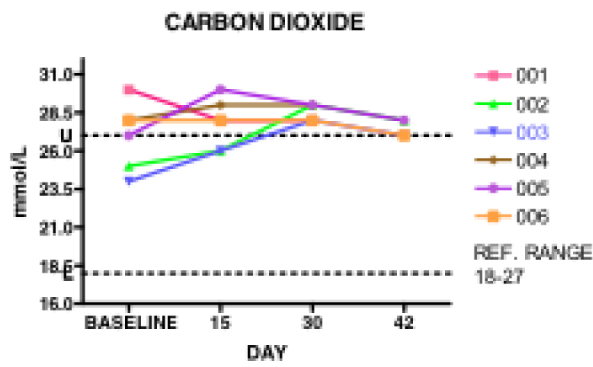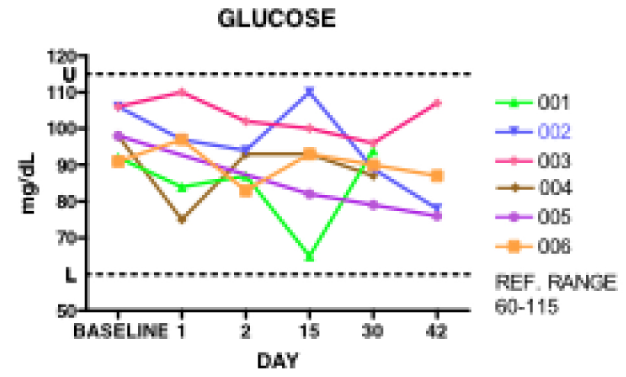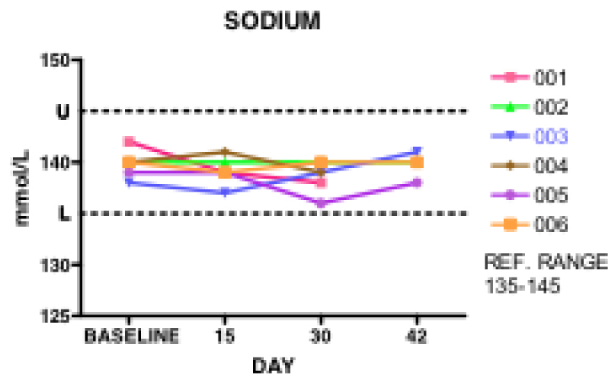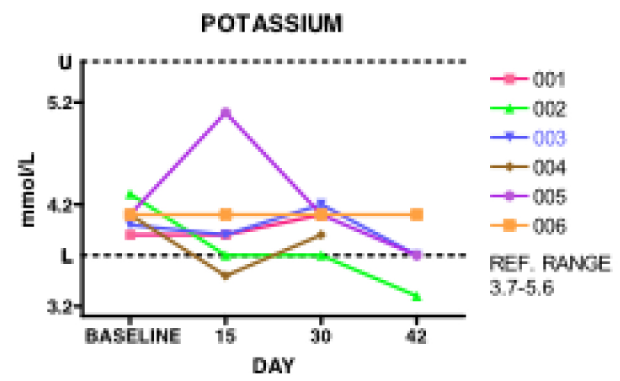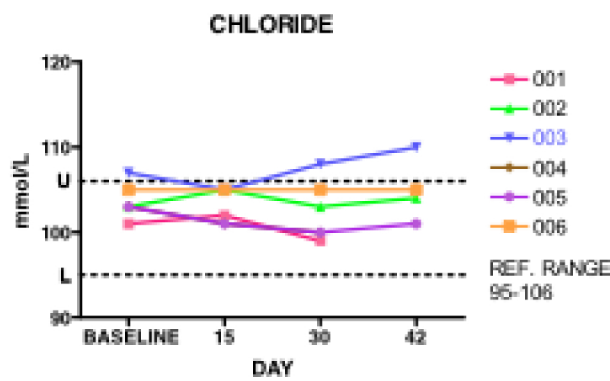

# HEMATOLOGY

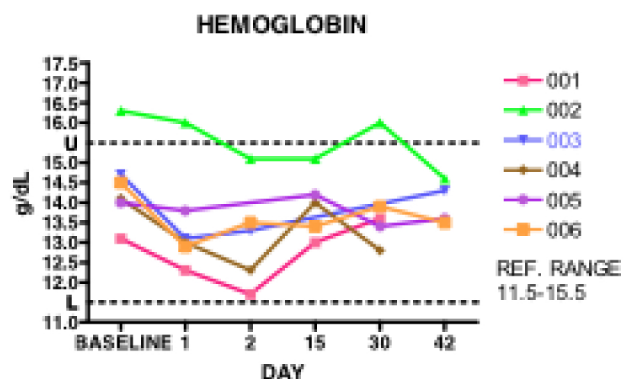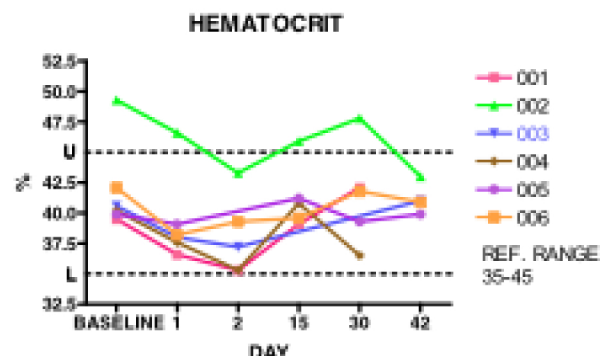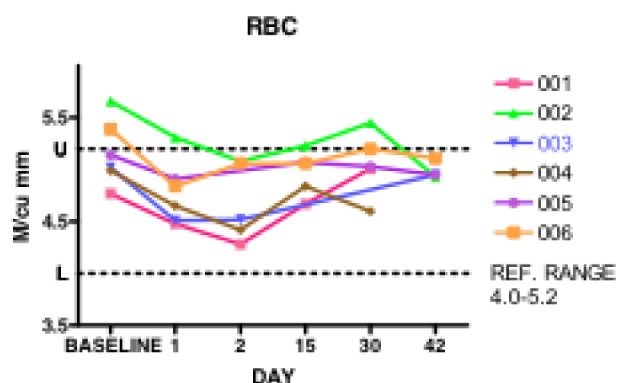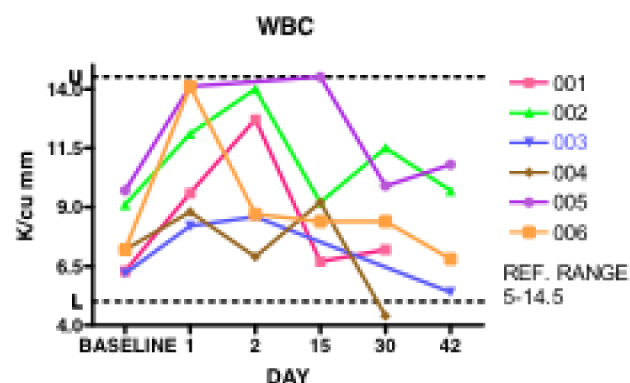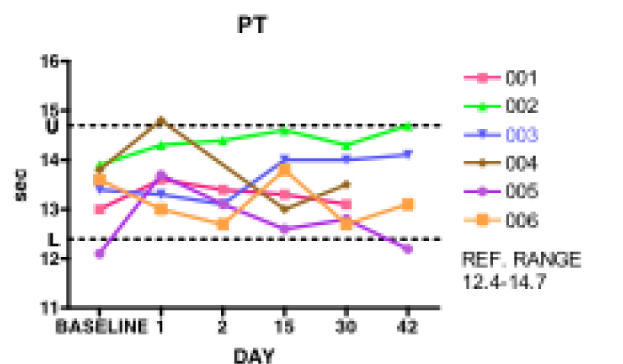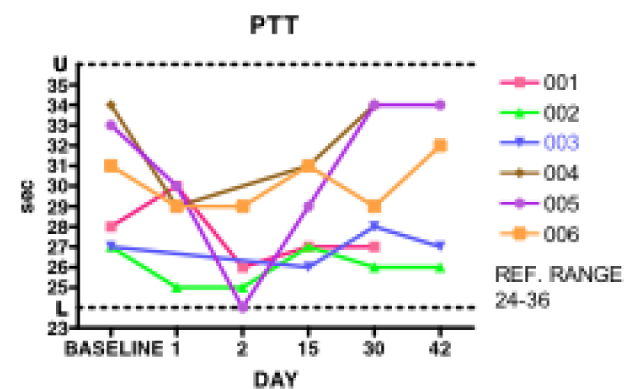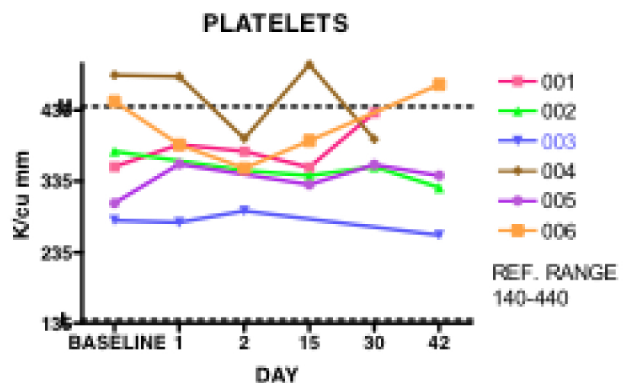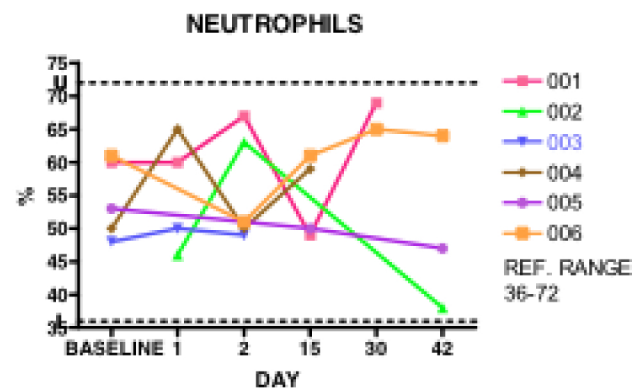

# HEMATOLOGY

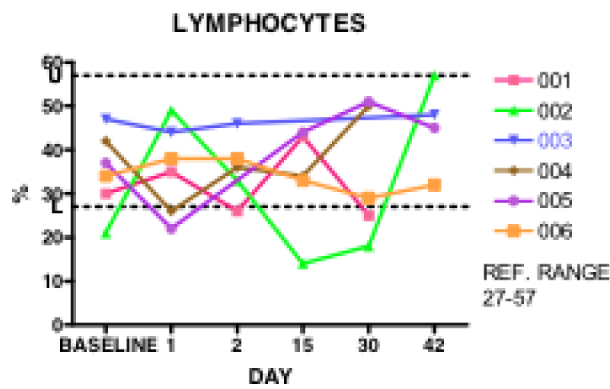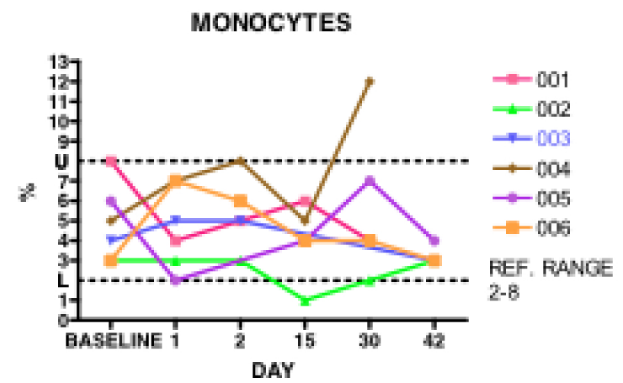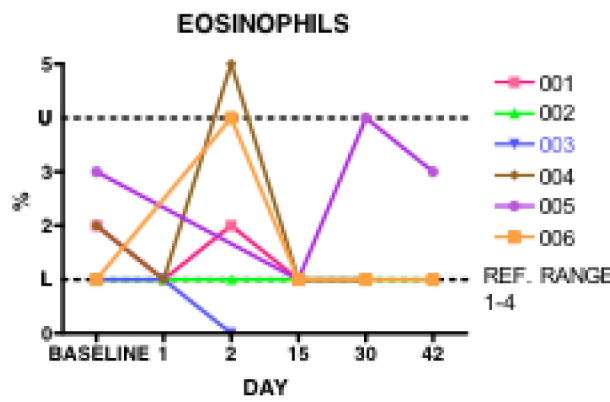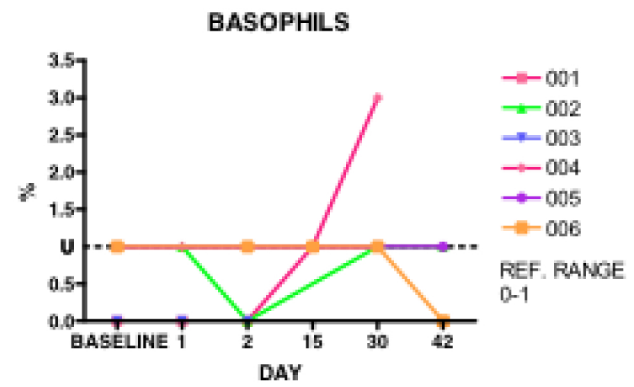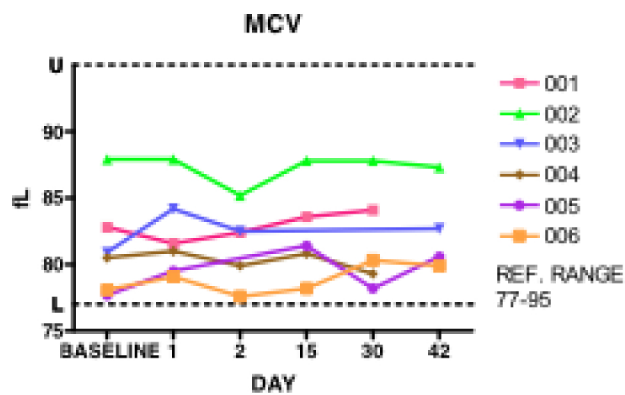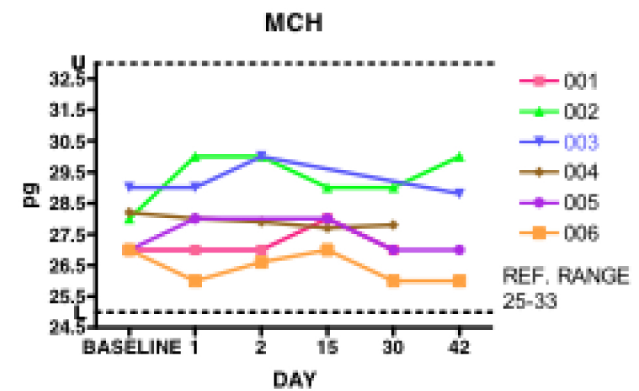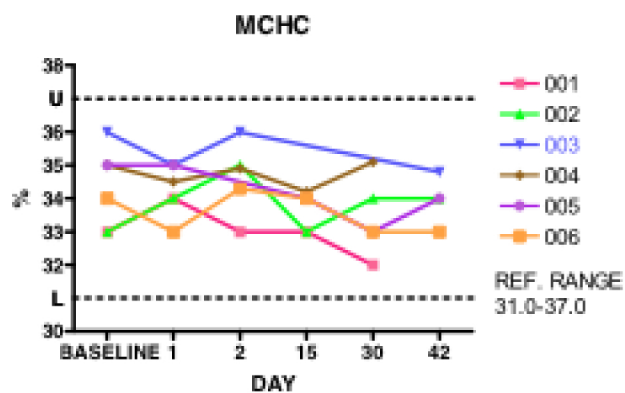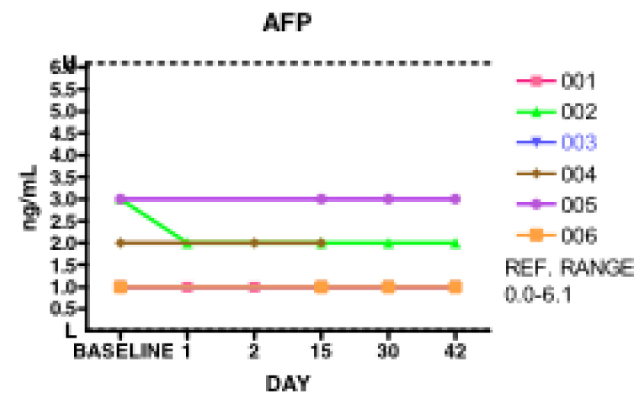



# URINALYSIS

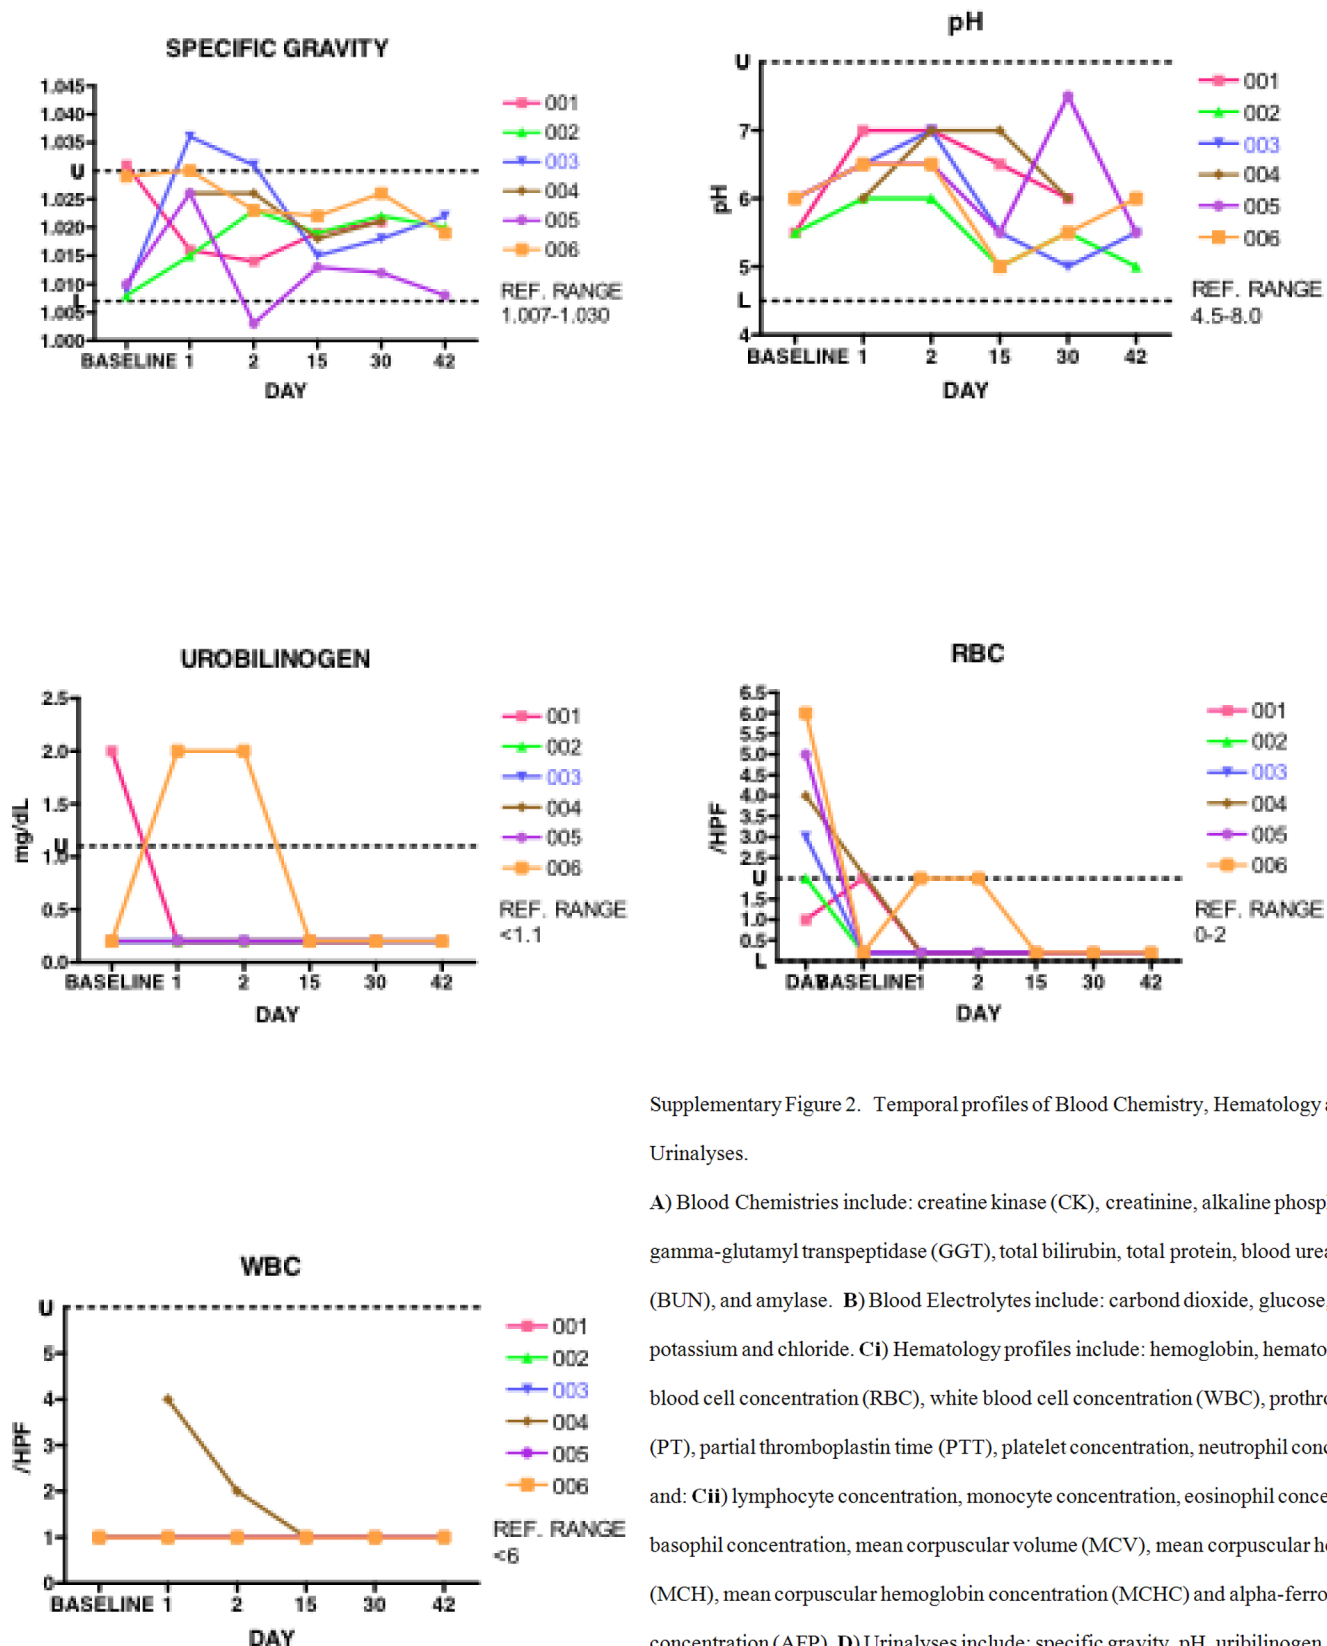

Supplementary Figure 2. Temporal profiles of Blood Chemistry, Hematology and Urinalyses.

A) Blood Chemistries include: creatine kinase (CK), creatinine, alkaline phosphatase, gamma-glutamyl transpeptidase (GGT), total bilirubin, total protein, blood urea nitrogen (BUN), and amylase. B) Blood Electrolytes include: carbon dioxide, glucose, sodium, potassium and chloride. Ci) Hematology profiles include: hemoglobin, hematocrit, red blood cell concentration (RBC), white blood cell concentration (WBC), prothrombin time (PT), partial thromboplastin time (PTT), platelet concentration, neutrophil concentration and: Cii) lymphocyte concentration, monocyte concentration, eosinophil concentration, basophil concentration, mean corpuscular volume (MCV), mean corpuscular hemoglobin (MCH), mean corpuscular hemoglobin concentration (MCHC) and alpha-fetoprotein concentration (AFP). D) Urinalyses include: specific gravity, pH, urobilinogen concentration, RBC and WBC.
